# Supplementary material
Source: PubMed Central journal article supplement (PMC4826005)
Supplement: supp_tpc.15.00691_tpc15.00691.DryadNotice.pdf [file supp_tpc.15.00691_tpc15.00691.DryadNotice.pdf]

**Supplemental Data Sets. Yang et al. (2015). Plant Cell 10.1105/tpc.15.00691.**

**Genome-wide Mapping of Targets of Maize Histone Deacetylase HDA101 Reveals Its Function and Regulatory Mechanism during Seed Development.**

The following Supplemental Data Sets are available at <http://datadryad.org/> under accession number [10.5061/dryad.4vg33](http://dx.doi.org/10.5061/dryad.4vg33).

*Note that all data sets are excel files that will be downloaded from the dryad site in a single .RAR file, which can be unzipped using WinZip or the open source 7-zip application.*

**Supplemental Data Set 1.** Peaks corresponding to HDA101 binding sites, which are uniquely or significantly enriched in 4 DAP seeds of wild-type B73 compared to the *hda101-1* mutant plants.

**Supplemental Data Set 2.** H4K5ac distribution in wild-type B73 and *hda101-1* mutant.

**Supplemental Data Set 3.** HDA101 target genes with altered H4K5ac levels in the 4 DAP seeds of *hda101-1* mutant compared to wild-type B73 plants.

**Supplemental Data Set 4.** List of transcripts differentially expressed in 4 DAP seeds of *hda101-1* mutant and wild-type B73 plants.

**Supplemental Data Set 5.** List of HDA101 direct targets exhibiting an increase of H4K5ac level in the *hda101-1* mutant.

**Supplemental Data Set 6.** Putative HDA101 interacting proteins identified by Co-IP assay.

**Supplemental Data Set 7.** Primers and Gene ID for sequences used in this study.
